# Supplementary material
Source: publisher figshare collection journal article supplement (https://frontiersin.figshare.com/ndownloader/files/12381362)
Supplement: Supplementary file [file 12381362]

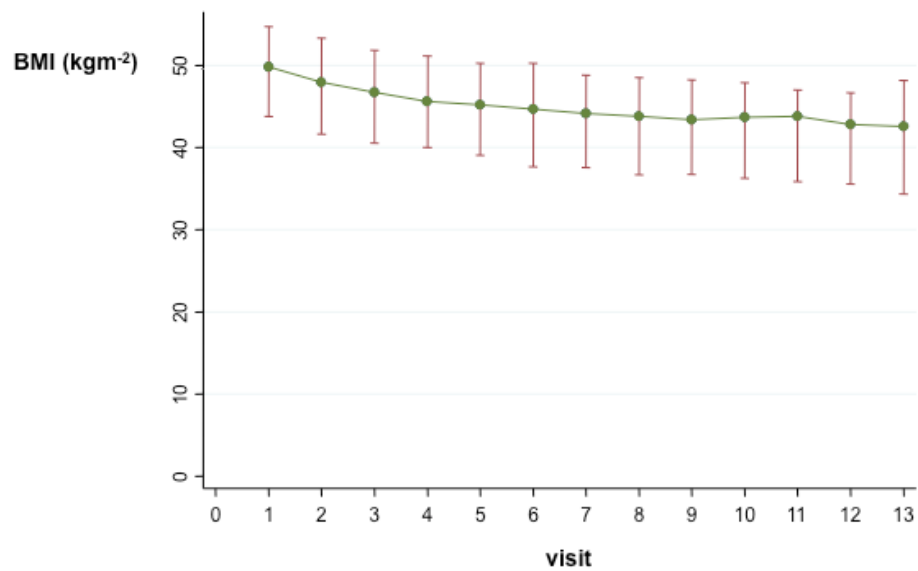

**Supplementary Information, Figure 1:** Median (IQR) BMI (kg/m<sup>2</sup>) by visit and at the 3 month follow-up (visit 13)
